# Supplementary material for: Validity of the Italian algorithm for the attribution of neuropsychiatric events in systemic lupus erythematosus: a retrospective multicentre international diagnostic cohort study
Source: PubMed Central journal article supplement — BMJ Open. 2017 May 29;7(5):e015546. doi: 10.1136/bmjopen-2016-015546 (PMC5730002; doi:10.1136/bmjopen-2016-015546), 2017-05-29
Supplement: bmjopen-2016-015546supp001.pdf [file bmjopen-2016-015546supp001.pdf]

Supplementary\_S1.

Check-list of favouring factors (including SLE-specific risk factors recognized by EULAR recommendations and those arbitrarily defined by the expert panel), deemed as potentially related to each NP event.

| Central Nervous System pictures (according to 1999 ACR classification) | SLE-specific risk factors (as listed by 2010 EULAR recommendations (citazione))                                                                                                                                                                                   | Reference                                                                                                                                          | Favouring Factors (deemed as relevant by the expert panel)                                                                          | Evidence                     | Notes                                                                                                             |
|------------------------------------------------------------------------|-------------------------------------------------------------------------------------------------------------------------------------------------------------------------------------------------------------------------------------------------------------------|----------------------------------------------------------------------------------------------------------------------------------------------------|-------------------------------------------------------------------------------------------------------------------------------------|------------------------------|-------------------------------------------------------------------------------------------------------------------|
| <b>CVD</b>                                                             | <ul style="list-style-type: none"> <li>SLE disease activity</li> <li>aPL antibodies<sup>1</sup></li> <li>Heart valve disease<sup>2</sup></li> <li>Previous CVD</li> <li>Age</li> </ul>                                                                            | (1)<br>(2)(3)(4)(5)(6)(7)(8)(9)(10)<br>(11)(5)(12)<br><br>(13)(3)<br>(14)(15)(16)                                                                  | <ul style="list-style-type: none"> <li>Age &lt; 50 years</li> </ul>                                                                 | (EP)                         | SLEDAI > 6<br><br>Libman-Sack endocarditis (aPL+)                                                                 |
| <b>Seizure disorder</b>                                                | <ul style="list-style-type: none"> <li>SLE disease activity</li> <li>SLE damage</li> <li>aPL antibodies<sup>1</sup></li> <li>Past or concurrent Major NPSLE<sup>3</sup></li> <li>Anti-Sm antibodies</li> </ul>                                                    | (17)(13)(18)(19)(20)(21)<br>(21)<br>(22)(17)(13)(23)(19)(21)<br>(2)(17)(13)(3)(20)(21)<br><br>(21)(24)                                             | <ul style="list-style-type: none"> <li>No familiar history</li> <li>Abnormal neuroimaging</li> </ul>                                | (EP)<br><br>(EP)<br>(EP)     | SLEDAI > 6<br>SDI > 1.5<br><br>Seizure disorder, CVD, psychosis<br><br>MRI or SPECT                               |
| <b>Cognitive dysfunction</b>                                           | <ul style="list-style-type: none"> <li>SLE disease activity</li> <li>SLE damage</li> <li>Past or concurrent Major NPSLE<sup>3</sup></li> <li>aPL antibodies<sup>1</sup></li> <li>Heart valve disease<sup>2</sup></li> <li>Education level</li> <li>Age</li> </ul> | (2)(25)(26)(27)(28)<br>(29)(30)<br>(22)(31)(32)(33)(34)(35)<br><br>(22)(30)(36)(37)(38)<br>(11)(39)<br><br>(40)(37)(41)<br>(40)(2)(42)(30)(41)(43) | <ul style="list-style-type: none"> <li>Age &lt; 50 years</li> <li>Response to IS or GC Rx</li> <li>Abnormal neuroimaging</li> </ul> | (EP)<br>(EP)<br>(EP)<br>(EP) | SLEDAI ≥ 16<br>SDI ≥ 1.0<br><br>Libman sacks endocarditis (aPL+)<br>At least secondary school<br><br>MRI or SPECT |
| <b>Movement disorders</b>                                              | <ul style="list-style-type: none"> <li>aPL antibodies<sup>1</sup></li> </ul>                                                                                                                                                                                      | (22) (44)(45)(46)(47)                                                                                                                              | <ul style="list-style-type: none"> <li>Response to IS or GC Rx</li> </ul>                                                           | (EP)                         |                                                                                                                   |

|                                |                                                                                                                                              |                                                                                         |                                                                                                                                                                                                                                         |                                              |                                                                   |
|--------------------------------|----------------------------------------------------------------------------------------------------------------------------------------------|-----------------------------------------------------------------------------------------|-----------------------------------------------------------------------------------------------------------------------------------------------------------------------------------------------------------------------------------------|----------------------------------------------|-------------------------------------------------------------------|
|                                |                                                                                                                                              |                                                                                         | <ul style="list-style-type: none"> <li>Abnormal neuroimaging</li> <li>High SLE disease activity</li> </ul>                                                                                                                              | (EP)<br>(EP)                                 | MRI or SPECT<br>SLEDAI > 6                                        |
| <b>Acute confusional state</b> | <ul style="list-style-type: none"> <li>SLE disease activity</li> <li>Past or concurrent Major NPSLE<sup>3</sup></li> </ul>                   | (11)(3)<br>(48)                                                                         | <ul style="list-style-type: none"> <li>Abnormal neuroimaging</li> <li>Response to IS or GC Rx</li> </ul>                                                                                                                                | (EP)<br>(EP)                                 | MRI or SPECT                                                      |
| <b>Psychiatric disorders</b>   | <ul style="list-style-type: none"> <li>SLE disease activity</li> <li>Past or concurrent Major NPSLE<sup>3</sup></li> <li>Anti-ENA</li> </ul> | (2)(49)(50)(51)(52)(53)<br>(32)(54)(55)<br><br>(24)(56)(57)<br>(58)(59)(60)(61)(62)(63) | <ul style="list-style-type: none"> <li>Anti-ribosomal-p antibodies</li> <li>No familiar history</li> <li>Abnormal neuroimaging</li> </ul>                                                                                               | (EP)<br>(EP)<br>(EP)                         | SLEDAI ≥16<br><br>Anti-Sm, anti-RNP, anti-Ro<br><br>MRI or SPECT  |
| <b>Myelopathy</b>              | <ul style="list-style-type: none"> <li>aPL antibodies<sup>1</sup></li> </ul>                                                                 | (64)(65)(66)(67)                                                                        | <ul style="list-style-type: none"> <li>Response to IS or GC Rx</li> <li>High SLE disease activity</li> </ul>                                                                                                                            | (EP)<br>(EP)                                 | SLEDAI > 6                                                        |
| <b>MS-like syndrome</b>        |                                                                                                                                              |                                                                                         | <ul style="list-style-type: none"> <li>aPL antibodies</li> <li>CSF &lt; 4 OCB</li> <li>High SLE disease activity</li> </ul>                                                                                                             | (EP)<br>(EP)                                 | Persistently medium-high titres<br><br>SLEDAI > 6                 |
| <b>Aseptic Meningitis</b>      |                                                                                                                                              |                                                                                         | <ul style="list-style-type: none"> <li>Response to IS or GC Rx</li> <li>High SLE disease activity</li> </ul>                                                                                                                            | (EP)<br>(EP)                                 | SLEDAI > 6                                                        |
| <b>Mood abnormalities</b>      |                                                                                                                                              |                                                                                         | <ul style="list-style-type: none"> <li>Anti-rib-P antibodies</li> <li>Abnormal neuroimaging</li> <li>High SLE disease activity</li> </ul>                                                                                               | (EP)<br>(EP)<br>(EP)                         | MRI or SPECT<br>SLEDAI > 6                                        |
| <b>Anxiety</b>                 |                                                                                                                                              |                                                                                         | <ul style="list-style-type: none"> <li>Abnormal neuroimaging</li> <li>High SLE disease activity</li> </ul>                                                                                                                              | (EP)<br>(EP)                                 | MRI or SPECT<br>SLEDAI > 6                                        |
| <b>Headache</b>                |                                                                                                                                              |                                                                                         | <ul style="list-style-type: none"> <li>No familiar history</li> <li>Abnormal neuroimaging</li> <li>aPL antibodies (^)</li> <li>Response to IS or GC Rx</li> <li>High SLE disease activity</li> <li>High SLE disease activity</li> </ul> | (EP)<br>(EP)<br>(EP)<br>(EP)<br>(EP)<br>(EP) | MRI or SPECT<br>Persistently medium-high titres<br><br>SLEDAI > 6 |

| Peripheral Nervous System pictures (according to 1999 ACR classification) | SLE-specific Risk factors (as listed by 2010 EULAR recommendations) cit | Reference          | Favouring Factors (deemed as relevant by the expert panel) | Evidence     | Notes                             |
|---------------------------------------------------------------------------|-------------------------------------------------------------------------|--------------------|------------------------------------------------------------|--------------|-----------------------------------|
| <b>Cranial neuropathy</b>                                                 | • aPL antibodies <sup>1</sup>                                           | (22)(2)            | • High SLE disease activity                                | (EP)         | SLEDAI > 6                        |
| <b>Peripheral neuropathy</b>                                              | • Anti-ENA                                                              | (2)(68)(24)        | • High SLE disease activity                                | (EP)         | anti-dsDNA, anti-Sm, anti-RNP     |
|                                                                           | • Anti-DNA<br>• Past or concurrent Major NPSLE <sup>3</sup>             | (2)<br>(17)(69)(3) | • High SLE disease activity                                | (EP)         | SLE-related Seizure<br>SLEDAI > 6 |
| <b>Mononeuritis</b>                                                       |                                                                         |                    | • Vasculitis<br>• High SLE disease activity                | (EP)<br>(EP) | SLEDAI > 6                        |
| <b>Myasthenia Gravis</b>                                                  |                                                                         |                    | • Response to IS or GC Rx<br>• High SLE disease activity   | (EP)<br>(EP) | SLEDAI > 6                        |
| <b>Autonomic Neuropathy</b>                                               |                                                                         |                    | • Response to IS or GC Rx<br>• High SLE disease activity   | (EP)<br>(EP) | SLEDAI > 6                        |
| <b>Acute Demyelinating Poliradiculopathy</b>                              |                                                                         |                    | • High SLE disease activity                                | (EP)         | SLEDAI > 6                        |
| <b>Plexopathy</b>                                                         |                                                                         |                    | • High SLE disease activity                                | (EP)         | SLEDAI > 6                        |

*CVD, cerebrovascular disease, SLEDAI, SLE disease activity index, aPL, antiphospholipid antibodies (including lupus anticoagulant), SDI, SLE International Collaborating Clinics Damage Index, MRI: Magnetic resonance imaging, SPECT: Single-photon emission computed tomography, CSF: Cerebrospinal fluid, anti rib-P antibodies, anti ribosomal-P antibodies. OCB, oligo-clonal bands, IS (immunosuppressant), GC (glucocorticosteroids),*

^ relevant in case of migraine.

(EP) correspond to the shared opinion of the Expert Panel.

The Expert Panel unanimously assumed that high SLE disease activity should be considered as a generic additional potential favoring factor also for those NP events where evidence is not established yet.

<sup>1</sup> Persistently positive, moderate-to-high titers of aPL antibodies

<sup>2</sup> Not septic Libman Sacks endocarditis

<sup>3</sup> Refers to past or concurrent major NPSLE syndrome

## References

1. Mikdashi J, Handwerger B, Langenberg P, Miller M, Kittner S. Baseline disease activity, hyperlipidemia, and hypertension are predictive factors for ischemic stroke and stroke severity in systemic lupus erythematosus. *Stroke J Cereb Circ.* 2007 Feb;38(2):281–5.
2. Mikdashi J, Handwerger B. Predictors of neuropsychiatric damage in systemic lupus erythematosus: data from the Maryland lupus cohort. *Rheumatol Oxf Engl.* 2004 Dec;43(12):1555–60.
3. Buján S, Ordi-Ros J, Paredes J, Mauri M, Matas L, Cortés J, et al. Contribution of the initial features of systemic lupus erythematosus to the clinical evolution and survival of a cohort of Mediterranean patients. *Ann Rheum Dis.* 2003 Sep;62(9):859–65.
4. Picillo U, Migliaresi S, Marcialis MR, Longobardo A, La Palombara F, Tirri G. Longitudinal survey of anticardiolipin antibodies in systemic lupus erythematosus. Relationships with clinical manifestations and disease activity in an Italian series. *Scand J Rheumatol.* 1992;21(6):271–6.
5. Roldan CA, Gelgand EA, Qualls CR, Sibbitt WL Jr. Valvular heart disease as a cause of cerebrovascular disease in patients with systemic lupus erythematosus. *Am J Cardiol.* 2005 Jun 15;95(12):1441–7.
6. Donders RC, Kappelle LJ, Derksen RH, Algra A, Horbach DA, de Groot PG, et al. Transient monocular blindness and antiphospholipid antibodies in systemic lupus erythematosus. *Neurology.* 1998 Aug;51(2):535–40.
7. Ishii Y, Nagasawa K, Mayumi T, Niho Y. Clinical importance of persistence of anticardiolipin antibodies in systemic lupus erythematosus. *Ann Rheum Dis.* 1990 Jun;49(6):387–90.
8. Kushner MJ. Prospective study of anticardiolipin antibodies in stroke. *Stroke J Cereb Circ.* 1990 Feb;21(2):295–8.
9. Sturfelt G, Eskilsson J, Nived O, Truedsson L, Valind S. Cardiovascular disease in systemic lupus erythematosus. A study of 75 patients from a defined population. *Medicine (Baltimore).* 1992 Jul;71(4):216–23.
10. Loch H, Wiik A. IgG and IgM isotypes of anti-cardiolipin and anti-beta2-glycoprotein I antibodies reflect different forms of recent thromboembolic events. *Clin Rheumatol.* 2006 Mar;25(2):246–50.
11. Roldan CA, Gelgand EA, Qualls CR, Sibbitt WL Jr. Valvular heart disease by transthoracic echocardiography is associated with focal brain injury and central neuropsychiatric systemic lupus erythematosus. *Cardiology.* 2007;108(4):331–7.

12. Molad Y, Levin-Iaina N, Vaturi M, Sulkes J, Sagie A. Heart valve calcification in young patients with systemic lupus erythematosus: a window to premature atherosclerotic vascular morbidity and a risk factor for all-cause mortality. *Atherosclerosis*. 2006 Apr;185(2):406–12.
13. Appenzeller S, Cendes F, Costallat LTL. Epileptic seizures in systemic lupus erythematosus. *Neurology*. 2004 Nov 23;63(10):1808–12.
14. Toloza SMA, Uribe AG, McGwin G Jr, Alarcón GS, Fessler BJ, Bastian HM, et al. Systemic lupus erythematosus in a multiethnic US cohort (LUMINA). XXIII. Baseline predictors of vascular events. *Arthritis Rheum*. 2004 Dec;50(12):3947–57.
15. Csépany T, Bereczki D, Kollár J, Sikula J, Kiss E, Csiba L. MRI findings in central nervous system systemic lupus erythematosus are associated with immunoserological parameters and hypertension. *J Neurol*. 2003 Nov;250(11):1348–54.
16. Morelli S, Bernardo ML, Viganego F, Sgreccia A, De Marzio P, Conti F, et al. Left-sided heart valve abnormalities and risk of ischemic cerebrovascular accidents in patients with systemic lupus erythematosus. *Lupus*. 2003;12(11):805–12.
17. Andrade RM, Alarcón GS, González LA, Fernández M, Apte M, Vilá LM, et al. Seizures in patients with systemic lupus erythematosus: data from LUMINA, a multiethnic cohort (LUMINA LIV). *Ann Rheum Dis*. 2008 Jun;67(6):829–34.
18. Jeffries M, Hamadeh F, Aberle T, Glenn S, Kamen DL, Kelly JA, et al. Haemolytic anaemia in a multi-ethnic cohort of lupus patients: a clinical and serological perspective. *Lupus*. 2008 Aug;17(8):739–43.
19. Shoenfeld Y, Lev S, Blatt I, Blank M, Font J, von Landenberg P, et al. Features associated with epilepsy in the antiphospholipid syndrome. *J Rheumatol*. 2004 Jul;31(7):1344–8.
20. Ramsey-Goldman R, Alarcón GS, McGwin G, Petri M, Vilá LM, Edberg JC, et al. Time to seizure occurrence and damage in PROFILE, a multi-ethnic systemic lupus erythematosus cohort. *Lupus*. 2008 Mar;17(3):177–84.
21. Mikdashi J, Krumholz A, Handwerker B. Factors at diagnosis predict subsequent occurrence of seizures in systemic lupus erythematosus. *Neurology*. 2005 Jun 28;64(12):2102–7.
22. Sanna G, Bertolaccini ML, Cuadrado MJ, Laing H, Khamashta MA, Mathieu A, et al. Neuropsychiatric manifestations in systemic lupus erythematosus: prevalence and association with antiphospholipid antibodies. *J Rheumatol*. 2003 May;30(5):985–92.
23. Herranz MT, Rivier G, Khamashta MA, Blaser KU, Hughes GR. Association between antiphospholipid antibodies and epilepsy in patients with systemic lupus erythematosus. *Arthritis Rheum*. 1994 Apr;37(4):568–71.

24. Hitchon CA, Peschken CA. Sm antibodies increase risk of death in systemic lupus erythematosus. *Lupus*. 2007;16(3):186–94.
25. Gladman DD, Urowitz MB, Slonim D, Glanz B, Carlen P, Noldy N, et al. Evaluation of predictive factors for neurocognitive dysfunction in patients with inactive systemic lupus erythematosus. *J Rheumatol*. 2000 Oct;27(10):2367–71.
26. Panopalis P, Julian L, Yazdany J, Gillis JZ, Trupin L, Hersh A, et al. Impact of memory impairment on employment status in persons with systemic lupus erythematosus. *Arthritis Rheum*. 2007 Dec 15;57(8):1453–60.
27. Hanly JG, Fisk JD, Sherwood G, Jones E, Jones JV, Eastwood B. Cognitive impairment in patients with systemic lupus erythematosus. *J Rheumatol*. 1992 Apr;19(4):562–7.
28. Kozora E, Ellison MC, West S. Depression, fatigue, and pain in systemic lupus erythematosus (SLE): relationship to the American College of Rheumatology SLE neuropsychological battery. *Arthritis Rheum*. 2006 Aug 15;55(4):628–35.
29. Petri M, Naqibuddin M, Carson KA, Sampedro M, Wallace DJ, Weisman MH, et al. Cognitive function in a systemic lupus erythematosus inception cohort. *J Rheumatol*. 2008 Sep;35(9):1776–81.
30. Tomietto P, Annese V, D’agostini S, Venturini P, La Torre G, De Vita S, et al. General and specific factors associated with severity of cognitive impairment in systemic lupus erythematosus. *Arthritis Rheum*. 2007 Dec 15;57(8):1461–72.
31. Hay EM, Black D, Huddy A, Creed F, Tomenson B, Bernstein RM, et al. Psychiatric disorder and cognitive impairment in systemic lupus erythematosus. *Arthritis Rheum*. 1992 Apr;35(4):411–6.
32. Monastero R, Bettini P, Del Zotto E, Cottini E, Tincani A, Balestrieri G, et al. Prevalence and pattern of cognitive impairment in systemic lupus erythematosus patients with and without overt neuropsychiatric manifestations. *J Neurol Sci*. 2001 Feb 15;184(1):33–9.
33. Emori A, Matsushima E, Aihara O, Ohta K, Koike R, Miyasaka N, et al. Cognitive dysfunction in systemic lupus erythematosus. *Psychiatry Clin Neurosci*. 2005 Oct;59(5):584–9.
34. Loukkola J, Laine M, Ainiäla H, Peltola J, Metsänoja R, Auvinen A, et al. Cognitive impairment in systemic lupus erythematosus and neuropsychiatric systemic lupus erythematosus: a population-based neuropsychological study. *J Clin Exp Neuropsychol*. 2003 Feb;25(1):145–51.
35. Sailer M, Burchert W, Ehrenheim C, Smid HG, Haas J, Wildhagen K, et al. Positron emission tomography and magnetic resonance imaging for cerebral involvement in patients with systemic lupus erythematosus. *J Neurol*. 1997 Mar;244(3):186–93.

36. Denburg SD, Carbotte RM, Ginsberg JS, Denburg JA. The relationship of antiphospholipid antibodies to cognitive function in patients with systemic lupus erythematosus. *J Int Neuropsychol Soc JINS*. 1997 Jul;3(4):377–86.
37. McLaurin EY, Holliday SL, Williams P, Brey RL. Predictors of cognitive dysfunction in patients with systemic lupus erythematosus. *Neurology*. 2005 Jan 25;64(2):297–303.
38. Leritz E, Brandt J, Minor M, Reis-Jensen F, Petri M. Neuropsychological functioning and its relationship to antiphospholipid antibodies in patients with systemic lupus erythematosus. *J Clin Exp Neuropsychol*. 2002 Jun;24(4):527–33.
39. Roldan CA, Gelgand EA, Qualls CR, Sibbitt WL Jr. Valvular heart disease is associated with nonfocal neuropsychiatric systemic lupus erythematosus. *J Clin Rheumatol Pract Rep Rheum Musculoskelet Dis*. 2006 Feb;12(1):3–10.
40. Brey RL, Holliday SL, Saklad AR, Navarrete MG, Hermosillo-Romo D, Stallworth CL, et al. Neuropsychiatric syndromes in lupus: prevalence using standardized definitions. *Neurology*. 2002 Apr 23;58(8):1214–20.
41. Ginsburg KS, Wright EA, Larson MG, Fossel AH, Albert M, Schur PH, et al. A controlled study of the prevalence of cognitive dysfunction in randomly selected patients with systemic lupus erythematosus. *Arthritis Rheum*. 1992 Jul;35(7):776–82.
42. Carlomagno S, Migliaresi S, Ambrosone L, Sannino M, Sanges G, Di Iorio G. Cognitive impairment in systemic lupus erythematosus: a follow-up study. *J Neurol*. 2000 Apr;247(4):273–9.
43. Glanz BI, Slonim D, Urowitz MB, Gladman DD, Gough J, MacKinnon A. Pattern of neuropsychologic dysfunction in inactive systemic lupus erythematosus. *Neuropsychiatry Neuropsychol Behav Neurol*. 1997 Oct;10(4):232–8.
44. Cervera R, Asherson RA, Font J, Tikly M, Pallarés L, Chamorro A, et al. Chorea in the antiphospholipid syndrome. Clinical, radiologic, and immunologic characteristics of 50 patients from our clinics and the recent literature. *Medicine (Baltimore)*. 1997 May;76(3):203–12.
45. Asherson RA, Derksen RH, Harris EN, Bouma BN, Gharavi AE, Kater L, et al. Chorea in systemic lupus erythematosus and “lupus-like” disease: association with antiphospholipid antibodies. *Semin Arthritis Rheum*. 1987 May;16(4):253–9.
46. Asherson RA, Mayou SC, Merry P, Black MM, Hughes GR. The spectrum of livedo reticularis and anticardiolipin antibodies. *Br J Dermatol*. 1989 Feb;120(2):215–21.

47. Cervera R, Piette J-C, Font J, Khamashta MA, Shoenfeld Y, Camps MT, et al. Antiphospholipid syndrome: clinical and immunologic manifestations and patterns of disease expression in a cohort of 1,000 patients. *Arthritis Rheum.* 2002 Apr;46(4):1019–27.
48. Futrell N, Schultz LR, Millikan C. Central nervous system disease in patients with systemic lupus erythematosus. *Neurology.* 1992 Sep;42(9):1649–57.
49. Ward MM, Studenski S. The time course of acute psychiatric episodes in systemic lupus erythematosus. *J Rheumatol.* 1991 Apr;18(4):535–9.
50. Purandare KN, Wagle AC, Parker SR. Psychiatric morbidity in patients with systemic lupus erythematosus. *QJM Mon J Assoc Physicians.* 1999 May;92(5):283–6.
51. Lim LC, Lee TE, Boey ML. Psychiatric manifestation of systemic lupus erythematosus in Singapore. A cross-cultural comparison. *Br J Psychiatry J Ment Sci.* 1991 Oct;159:520–3.
52. Nery FG, Borba EF, Hatch JP, Soares JC, Bonfá E, Neto FL. Major depressive disorder and disease activity in systemic lupus erythematosus. *Compr Psychiatry.* 2007 Feb;48(1):14–9.
53. Seguí J, Ramos-Casals M, García-Carrasco M, de Flores T, Cervera R, Valdés M, et al. Psychiatric and psychosocial disorders in patients with systemic lupus erythematosus: a longitudinal study of active and inactive stages of the disease. *Lupus.* 2000;9(8):584–8.
54. Utset TO, Golden M, Siberry G, Kiri N, Crum RM, Petri M. Depressive symptoms in patients with systemic lupus erythematosus: association with central nervous system lupus and Sjögren’s syndrome. *J Rheumatol.* 1994 Nov;21(11):2039–45.
55. Hanly JG, Fisk JD, McCurdy G, Fougere L, Douglas J-A. Neuropsychiatric syndromes in patients with systemic lupus erythematosus and rheumatoid arthritis. *J Rheumatol.* 2005 Aug;32(8):1459–1456.
56. Tikly M, Gould T, Wade AA, van der Westhuizen E, Mokgethwa BBN. Clinical and serological correlates of antinucleosome antibodies in South Africans with systemic lupus erythematosus. *Clin Rheumatol.* 2007 Dec;26(12):2121–5.
57. Shortall E, Isenberg D, Newman SP. Factors associated with mood and mood disorders in SLE. *Lupus.* 1995 Aug;4(4):272–9.
58. Bonfa E, Golombek SJ, Kaufman LD, Skelly S, Weissbach H, Brot N, et al. Association between lupus psychosis and anti-ribosomal P protein antibodies. *N Engl J Med.* 1987 Jul 30;317(5):265–71.



59. Schneebaum AB, Singleton JD, West SG, Blodgett JK, Allen LG, Cheronis JC, et al. Association of psychiatric manifestations with antibodies to ribosomal P proteins in systemic lupus erythematosus. *Am J Med.* 1991 Jan;90(1):54–62.
60. Teh LS, Hay EM, Amos N, Black D, Huddy A, Creed F, et al. Anti-P antibodies are associated with psychiatric and focal cerebral disorders in patients with systemic lupus erythematosus. *Br J Rheumatol.* 1993 Apr;32(4):287–90.
61. Yoshio T, Masuyama J, Ikeda M, Tamai K, Hachiya T, Emori T, et al. Quantification of antiribosomal P0 protein antibodies by ELISA with recombinant P0 fusion protein and their association with central nervous system disease in systemic lupus erythematosus. *J Rheumatol.* 1995 Sep;22(9):1681–7.
62. Briani C, Lucchetta M, Ghirardello A, Toffanin E, Zampieri S, Ruggero S, et al. Neurolupus is associated with anti-ribosomal P protein antibodies: an inception cohort study. *J Autoimmun.* 2009 Mar;32(2):79–84.
63. Karassa FB, Afeltra A, Ambrozic A, Chang D-M, De Keyser F, Doria A, et al. Accuracy of anti-ribosomal P protein antibody testing for the diagnosis of neuropsychiatric systemic lupus erythematosus: an international meta-analysis. *Arthritis Rheum.* 2006 Jan;54(1):312–24.
64. Lavalle C, Pizarro S, Drenkard C, Sánchez-Guerrero J, Alarcón-Segovia D. Transverse myelitis: a manifestation of systemic lupus erythematosus strongly associated with antiphospholipid antibodies. *J Rheumatol.* 1990 Jan;17(1):34–7.
65. Mok MY, Chan EYT, Fong DYT, Leung KFS, Wong WS, Lau CS. Antiphospholipid antibody profiles and their clinical associations in Chinese patients with systemic lupus erythematosus. *J Rheumatol.* 2005 Apr;32(4):622–8.
66. Alarcón-Segovia D, Delezé M, Oria CV, Sánchez-Guerrero J, Gómez-Pacheco L, Cabiedes J, et al. Antiphospholipid antibodies and the antiphospholipid syndrome in systemic lupus erythematosus. A prospective analysis of 500 consecutive patients. *Medicine (Baltimore).* 1989 Nov;68(6):353–65.
67. D’Cruz DP, Mellor-Pita S, Joven B, Sanna G, Allanson J, Taylor J, et al. Transverse myelitis as the first manifestation of systemic lupus erythematosus or lupus-like disease: good functional outcome and relevance of antiphospholipid antibodies. *J Rheumatol.* 2004 Feb;31(2):280–5.
68. Huynh C, Ho SL, Fong KY, Cheung RT, Mok CC, Lau CS. Peripheral neuropathy in systemic lupus erythematosus. *J Clin Neurophysiol Off Publ Am Electroencephalogr Soc.* 1999 Mar;16(2):164–8.

69. Feinglass EJ, Arnett FC, Dorsch CA, Zizic TM, Stevens MB. Neuropsychiatric manifestations of systemic lupus erythematosus: diagnosis, clinical spectrum, and relationship to other features of the disease. *Medicine (Baltimore)*. 1976 Jul;55(4):323–39.
