# Supplementary material for: Validity of the Italian algorithm for the attribution of neuropsychiatric events in systemic lupus erythematosus: a retrospective multicentre international diagnostic cohort study
Source: PubMed Central journal article supplement — BMJ Open. 2017 May 29;7(5):e015546. doi: 10.1136/bmjopen-2016-015546 (PMC5730002; doi:10.1136/bmjopen-2016-015546), 2017-05-29
Supplement: bmjopen-2016-015546supp003.pdf [file bmjopen-2016-015546supp003.pdf]

**Supplementary\_S3 Table S1.** Comparison between «a priori» vs «data driven» estimated scores (pooled analysis in 677 NP 1st events).

| Item                            | CATEGORY   | A PRIORI               | DATA DRIVEN                         |
|---------------------------------|------------|------------------------|-------------------------------------|
|                                 |            | ORIGINAL COEFFICIENTS* | (REFINED A POSTERIORI) COEFFICIENTS |
| Time onset of NP event          | Before     | 0                      | 0                                   |
|                                 | After      | 2                      | 2.1                                 |
|                                 | Concurrent | 3                      | 3.1                                 |
| Minor event (Ainiala list)      | Yes        | 0                      | 0                                   |
|                                 | No         | 3                      | 2.9                                 |
| Presence of Confounding Factors | $\geq 1$   | 0                      | 0                                   |
|                                 | 1          | 1                      | 0.7                                 |
|                                 | No         | 2                      | 1.9                                 |
| Presence of favouring factors   | No         | 0                      | 0                                   |
|                                 | 1          | 1                      | 0.9                                 |
|                                 | $\geq 1$   | 2                      | 2.1                                 |

(^) The resulting global score can range from 0 to 10; details for definition of each item category are reported elsewhere (9).

\*A priori coefficients (original coefficients), identify the better scores to be used in the final version of the Italian attribution algorithm, the so-called “original algorithm” (^)

**Supplementary\_S3 Table S2.** ROC curve analysis related to the following NP event observed in the international cohort, stratified by all subsequent events and in relation to the first event (related or unrelated).

| <b>Subsequent event</b>                    | <b>N° of events</b> | <b>AUC</b> | <b>[95% Conf. Interval]</b> |
|--------------------------------------------|---------------------|------------|-----------------------------|
| All                                        | 93                  | 0.80       | (0.71 – 0.88)               |
| After a 1 <sup>st</sup> unrelated NP event | 33                  | 0.83       | (0.68 – 0.97)               |
| After a 1 <sup>st</sup> related NP event   | 60                  | 0.79       | (0.68 – 0.91)               |

**Supplementary\_S3 Table S3.** Detailed report of sensitivity, specificity, PPV and NPV for each defined cut-point derived from the application of the attribution algorithm to the first NP event observed in the training (cohort 1), validating (cohort 2) and pooled cohorts (all three cohorts, including the international cohort).

| Cohort | Cut-point        | Sensitivity | Specificity | Correctly Classified | LR+     | LR-    | PPV     | NPV     |
|--------|------------------|-------------|-------------|----------------------|---------|--------|---------|---------|
| 1      | (>= 0)           | 100.00%     | 0.00%       | 62.67%               | 100.00% |        | 62.67%  |         |
| 1      | (>= 1)           | 100.00%     | 0.00%       | 62.67%               | 1       |        | 62.67%  |         |
| 1      | (>= 2)           | 100.00%     | 1.19%       | 63.11%               | 1.012   | 0      | 62.95%  | 100.00% |
| 1      | (>= 3)           | 99.29%      | 7.14%       | 64.89%               | 1.0693  | 0.0993 | 64.22%  | 85.70%  |
| 1      | (>= 4)           | 99.29%      | 16.67%      | 68.44%               | 1.1915  | 0.0426 | 66.67%  | 93.33%  |
| 1      | (>= 5)           | 95.74%      | 35.71%      | 73.33%               | 1.4894  | 0.1191 | 71.43%  | 83.32%  |
| 1      | <b>(&gt;= 6)</b> | 85.11%      | 61.90%      | <b>76.44%</b>        | 2.234   | 0.2406 | 78.95%  | 71.24%  |
| 1      | (>= 7)           | 58.87%      | 92.86%      | 71.56%               | 8.2411  | 0.443  | 93.26%  | 57.36%  |
| 1      | (>= 8)           | 36.17%      | 100.00%     | 60.00%               | 0.6383  |        | 100.00% | 48.28%  |
| 1      | (>= 9)           | 21.99%      | 100.00%     | 51.11%               | 0.7801  |        | 100.00% | 43.30%  |
| 1      | (>= 10)          | 6.38%       | 100.00%     | 41.33%               | 0.9362  |        | 100.00% |         |
| 1      | (> 10)           | 0.00%       | 100.00%     | 37.33%               | 1       |        |         |         |

| Cohort | Cut-point        | Sensitivity | Specificity | Correctly Classified | LR+    | LR-    | PPV    | NPV     |
|--------|------------------|-------------|-------------|----------------------|--------|--------|--------|---------|
| 2      | (>= 0)           | 100.00%     | 0.00%       | 51.20%               | 1      |        | 51.20% |         |
| 2      | (>= 1)           | 100.00%     | 0.00%       | 51.20%               | 1      |        | 51.20% |         |
| 2      | (>= 2)           | 100.00%     | 0.98%       | 51.67%               | 1.0099 | 0      | 51.44% | 100.00% |
| 2      | (>= 3)           | 97.20%      | 5.88%       | 52.63%               | 1.0327 | 0.4766 | 52.00% | 66.69%  |
| 2      | (>= 4)           | 96.26%      | 17.65%      | 57.89%               | 1.1689 | 0.2118 | 55.08% | 81.81%  |
| 2      | (>= 5)           | 91.59%      | 36.27%      | 64.59%               | 1.4372 | 0.2319 | 60.12% | 80.44%  |
| 2      | (>= 6)           | 85.98%      | 61.76%      | 74.16%               | 2.2487 | 0.227  | 70.23% | 80.77%  |
| 2      | <b>(&gt;= 7)</b> | 71.96%      | 80.39%      | <b>76.08%</b>        | 3.6701 | 0.3488 | 79.38% | 73.21%  |
| 2      | (>= 8)           | 58.88%      | 92.16%      | 75.12%               | 7.507  | 0.4462 | 88.74% | 68.12%  |
| 2      | (>= 9)           | 32.71%      | 95.10%      | 63.16%               | 6.6729 | 0.7076 | 87.50% | 57.40%  |
| 2      | (>= 10)          | 10.28%      | 98.04%      | 53.11%               | 5.243  | 0.9151 | 84.62% | 51.02%  |
| 2      | (> 10)           | 0.00%       | 100.00%     | 48.80%               | 1      |        |        | 48.80%  |

| <b>Cohort</b> | <b>Cut-point</b> | <b>Sensitivity</b> | <b>Specificity</b> | <b>Correctly Classified</b> | <b>LR+</b> | <b>LR-</b> | <b>PPV</b> | <b>NPV</b> |
|---------------|------------------|--------------------|--------------------|-----------------------------|------------|------------|------------|------------|
| pooled        | ( >= 0 )         | 100.00%            | 0.00%              | 51.26%                      | 1          |            | 51.26%     |            |
| pooled        | ( >= 1 )         | 100.00%            | 0.91%              | 51.70%                      | 1.0092     | 0          | 51.48%     | 100.00%    |
| pooled        | ( >= 2* )        | 99.71%             | 3.33%              | 52.73%                      | 1.0315     | 0.0865     | 52.03%     | 91.61%     |
| pooled        | ( >= 3 )         | 98.56%             | 10.91%             | 55.83%                      | 1.1063     | 0.1321     | 53.77%     | 87.81%     |
| pooled        | ( >= 4 )         | 97.41%             | 23.64%             | 61.45%                      | 1.2756     | 0.1097     | 57.29%     | 89.67%     |
| pooled        | ( >= 5 )         | 93.66%             | 41.52%             | 68.24%                      | 1.6014     | 0.1527     | 62.74%     | 86.17%     |
| pooled        | ( >= 6 )         | 87.32%             | 66.06%             | 76.96%                      | 2.5728     | 0.1919     | 73.01%     | 83.21%     |
| pooled        | ( >= 7 )         | 71.18%             | 84.55%             | 77.70%                      | 4.6059     | 0.3409     | 82.89%     | 73.61%     |
| pooled        | ( >= 8* )        | 52.74%             | 93.64%             | 72.67%                      | 8.2874     | 0.5047     | 89.71%     | 65.33%     |
| pooled        | ( >= 9 )         | 32.56%             | 97.27%             | 64.11%                      | 11.9404    | 0.6933     | 92.62%     | 57.84%     |
| pooled        | ( >= 10 )        | 11.24%             | 99.09%             | 54.06%                      | 12.3631    | 0.8958     | 92.85%     | 51.50%     |
| pooled        | ( > 10 )         | 0.00%              | 100.00%            | 48.74%                      | 1          |            |            | 48.74%     |

\*Cut points ensuring a misclassification probability less than 10%
