# Supplementary material for: Validity of the Italian algorithm for the attribution of neuropsychiatric events in systemic lupus erythematosus: a retrospective multicentre international diagnostic cohort study
Source: PubMed Central journal article supplement — BMJ Open. 2017 May 29;7(5):e015546. doi: 10.1136/bmjopen-2016-015546 (PMC5730002; doi:10.1136/bmjopen-2016-015546), 2017-05-29
Supplement: bmjopen-2016-015546supp004.pdf [file bmjopen-2016-015546supp004.pdf]

## Supplementary S4

Members of the Italian Study Group on Neuropsychiatric Systemic Lupus Erythematosus of the Italian Society of Rheumatology:

Stefano Bombardieri<sup>1</sup>,  
Fabrizio Conti<sup>2</sup>,  
Salvatore De Vita<sup>3</sup>,  
Andrea Doria<sup>4</sup>,  
Gianfranco Ferraccioli<sup>5</sup>,  
Elisa Gremese<sup>5</sup>,  
Alessandro Mathieu<sup>6</sup>,  
Marta Mosca<sup>1</sup>,  
Melissa Padovan<sup>7</sup>,  
Matteo Piga<sup>6</sup>,  
Angela Tincani<sup>8</sup>,  
Paola Tomietto<sup>9</sup>,  
Guido Valesini<sup>2</sup>,  
Margherita Zen<sup>4</sup>

<sup>1</sup>Rheumatology Unit, Department of Clinical and Experimental Medicine, University of Pisa, Pisa

<sup>2</sup>Department of Internal Medicine and Medical Specialties, Sapienza University of Rome, Rome

<sup>3</sup>Rheumatology Clinic, Azienda Ospedaliero Universitaria 'S. Maria della Misericordia' and DSMB, Department of Medical and Biological Sciences, University of Udine, Udine

<sup>4</sup>Department of Clinical and Experimental Medicine, Division of Rheumatology, University of Padova, Padova

<sup>5</sup>Division of Rheumatology and Internal Medicine, Institute of Rheumatology and Affine Sciences, CIC, Catholic University of the Sacred Heart, Rome,

<sup>6</sup>Rheumatology Unit, Department of Medical Sciences, University of Cagliari and AOU University Clinic, Cagliari

<sup>7</sup>Department of Medical Sciences, Section of Rheumatology, University of Ferrara and Azienda Ospedaliero Universitaria Sant'Anna di Cona, Ferrara

<sup>8</sup>Rheumatology and Clinical Immunology Unit, Spedali Civili and University of Brescia, Brescia

<sup>9</sup>Internal Medicine, AOU 'Ospedali Riuniti' of Trieste, Trieste, Italy
